# Supplementary material
Source: PubMed Central journal article supplement (PMC2944324)

**Supplemental Figure Legends.**

**Figure 1S.** Spontaneous oscillations in outward current recorded from an on-cell patch with a pipette filled as stated in Methods. Oscillation frequency = 0.4 Hz.

**Figure 2S.** Effect of  $\text{Ca}^{2+}$ -free external solution on  $[\text{Ca}^{2+}]_i$  oscillations in HL-1 cells. **A.** Minimal restoration of  $[\text{Ca}^{2+}]_i$  oscillations on restoring external  $\text{Ca}^{2+}$ . **B.** Restoration of  $[\text{Ca}^{2+}]_i$  oscillations on restoring external  $\text{Ca}^{2+}$ .

**Figure 3S.** Effect of added isoproterenol (10  $\mu\text{M}$ ) on  $[\text{Ca}^{2+}]_i$  oscillations in HL-1 cells. *Left* shows effect of addition on  $[\text{Ca}^{2+}]_i$  oscillations in nine individual HL-1 cells. *Right* shows effect of addition average  $[\text{Ca}^{2+}]_i$ . Mean  $\pm$  SE (n = 32).

**Figure 4S.** **A.** Action potential recorded by stimulation of whole-cell current-clamped HL-1 cell. Current = 0.4 nA, 2 ms. **B.** Voltage-activated inward and outward currents in a whole-cell voltage-clamped HL-1 cell. N.B. Whole-cell pipette filling solution did not contain 10 mM TEA Cl. HP = -80 mV **C.** Current traces showing voltage inactivation of the voltage-activated inward current component of an HL-1 cell. HP = -80 mV.

**Figure 5S.** Representative traces of the protocols used to measure: 1) hyperpolarization-activated  $I_f$  (*left*) and 2) tail currents of fully activated  $I_f$  (right) in HL-1 cells. *Top traces:* currents; *Bottom traces:* voltages. Time and current traces apply to all figures.

**Figure 6S.** Effect of LPS on long-lasting, L-type  $\text{Ca}^{2+}$  currents in HL-1 cells. **A.** Overlay of three current traces generated by voltage clamp of the same cell. **Black-** voltage activation of inward current of cell bathed with standard salt solution containing  $\text{Na}^+$ ; **Red-** voltage activation of inward current of cell bathed with  $\text{Na}^+$ -free/5-mM  $\text{Ca}^{2+}$  solution; **Blue-** voltage activation of inward current of cell bathed with  $\text{Na}^+$ -free/5-mM  $\text{Ca}^{2+}$  solution plus LPS ( $1\mu\text{g/ml}$  *E. Coli*). **B.** Current-voltage (I-V) plot of voltage-activated L-type  $\text{Ca}^{2+}$  current without and with added LPS ( $1\mu\text{g/ml}$  *E. Coli*).

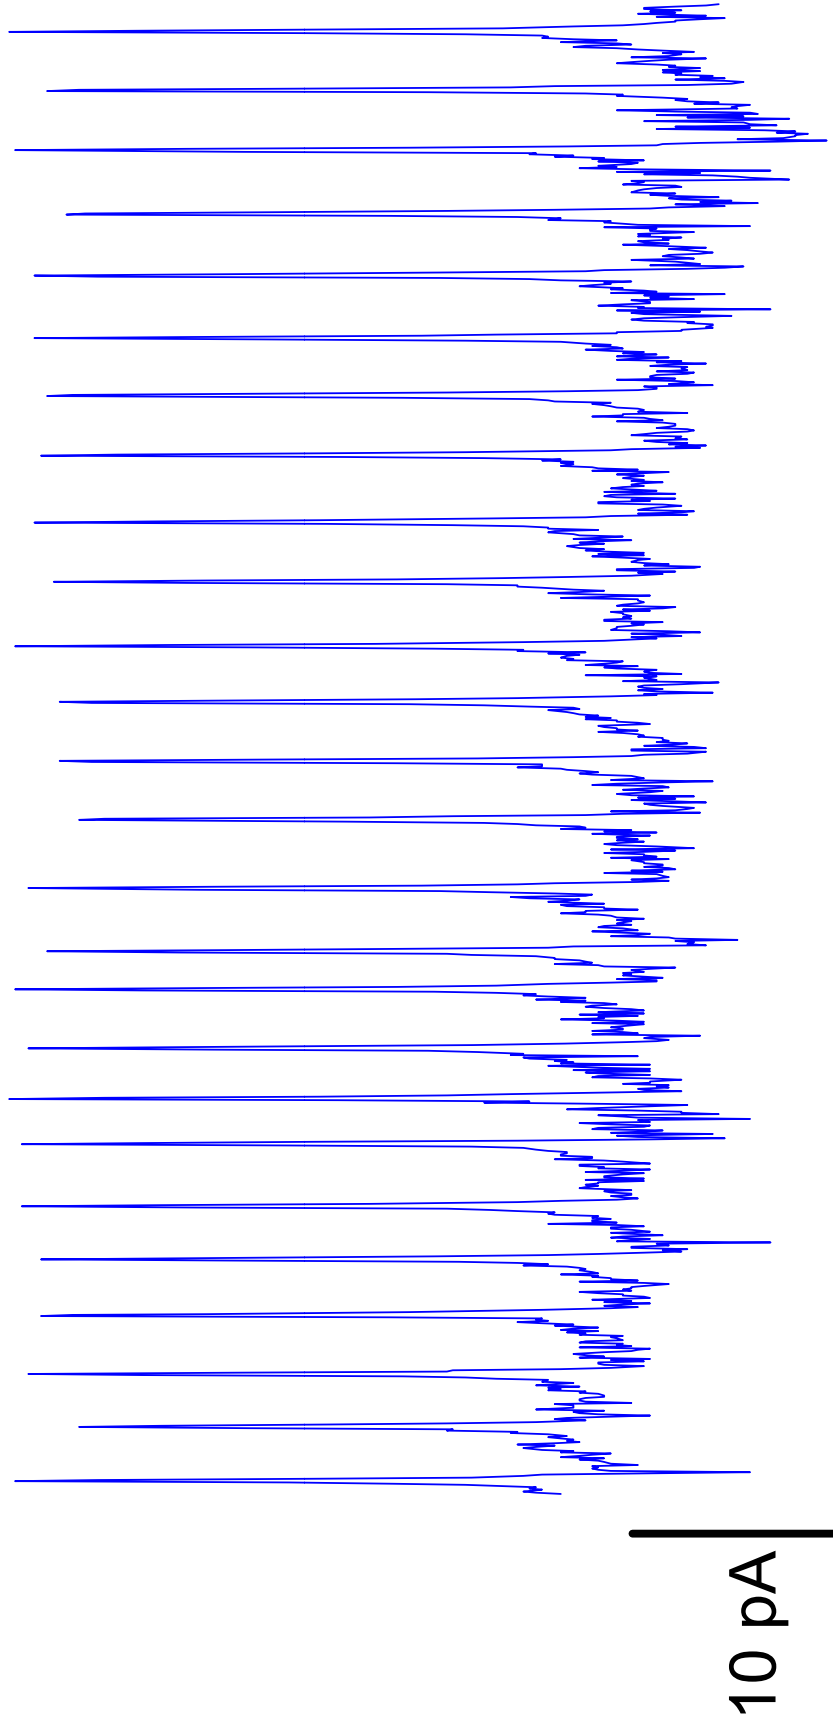

10 pA

10 s

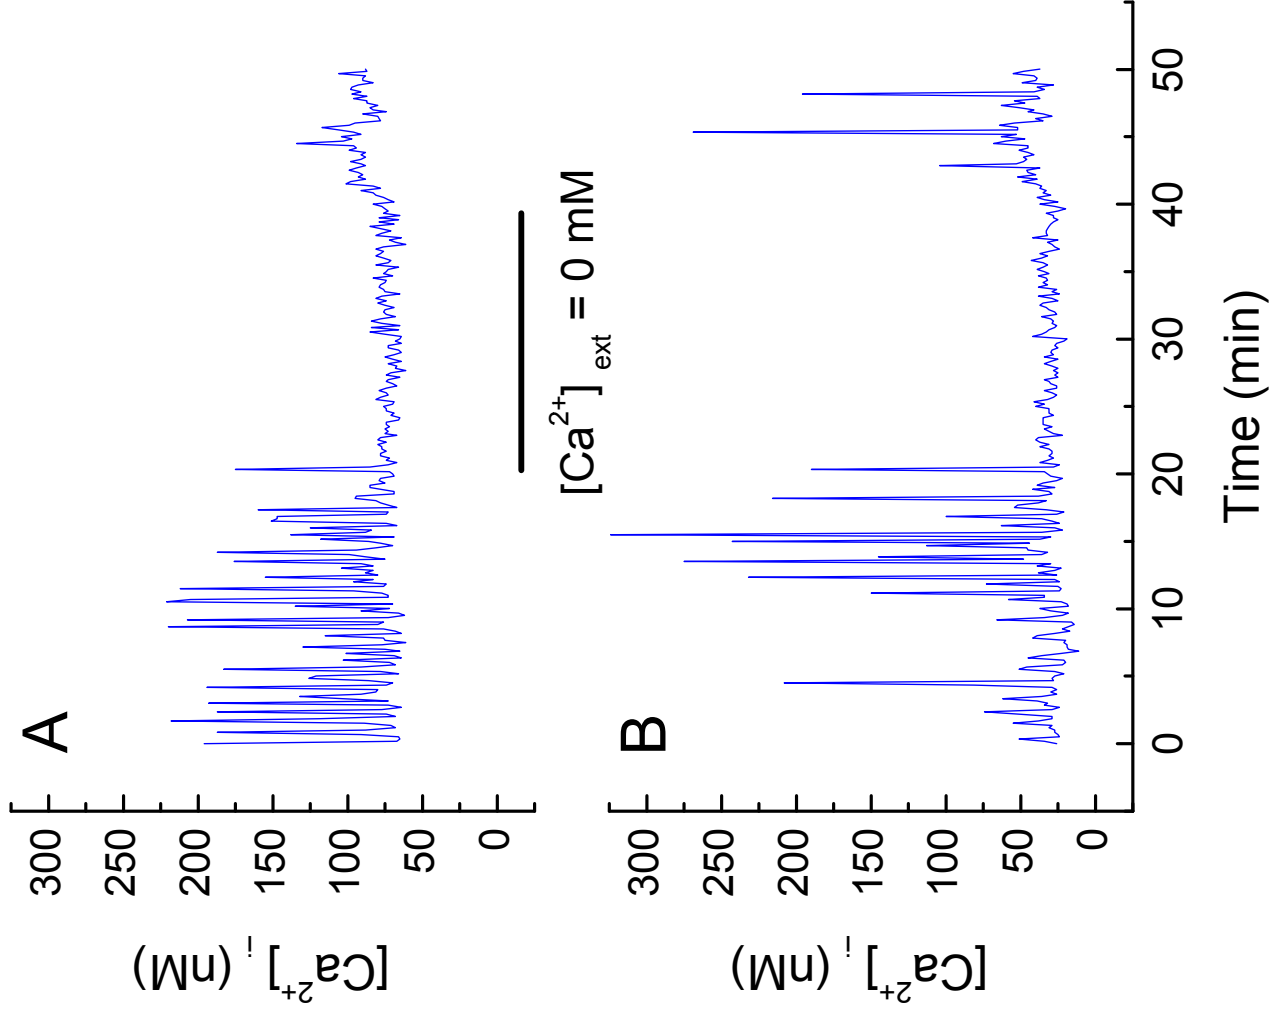

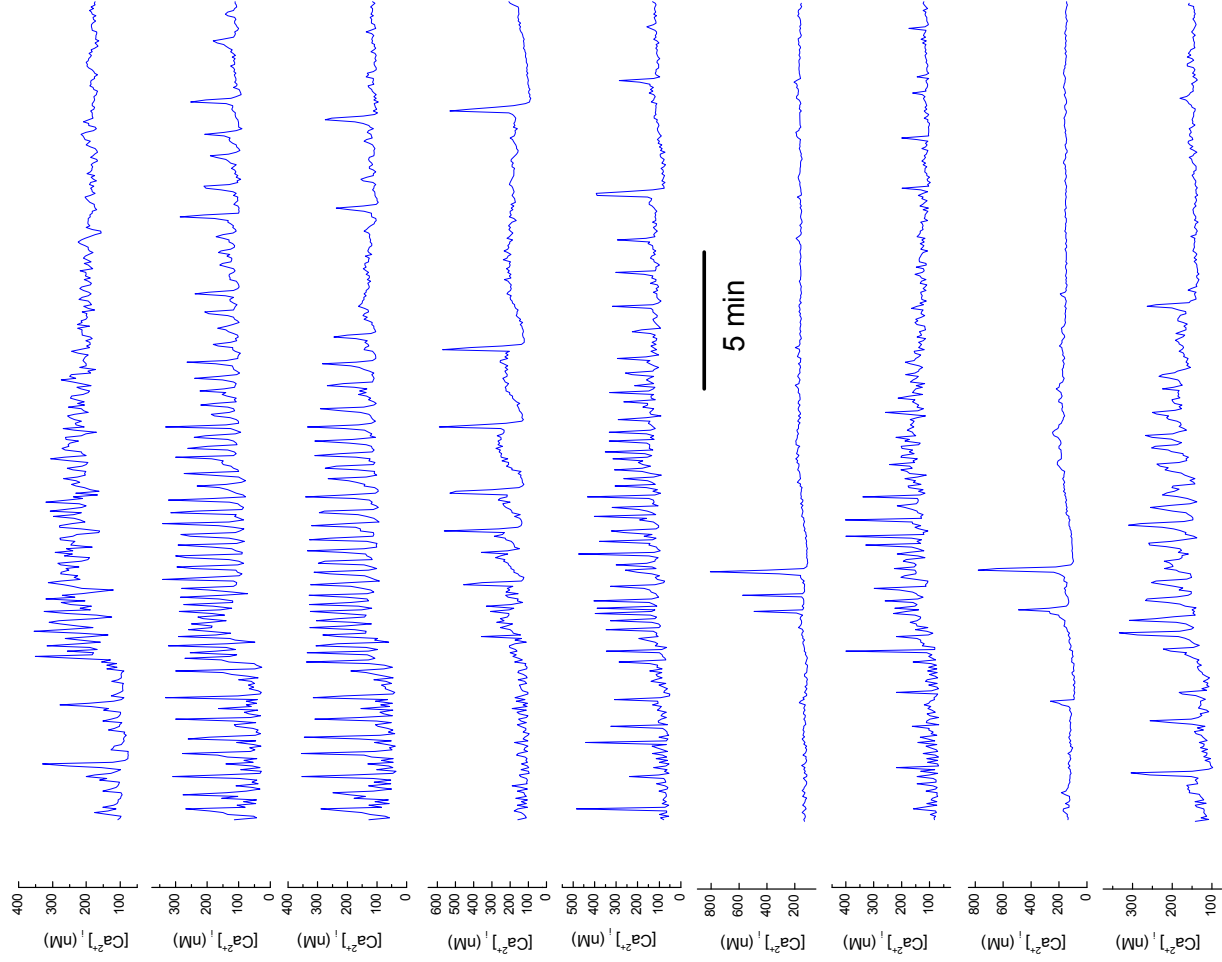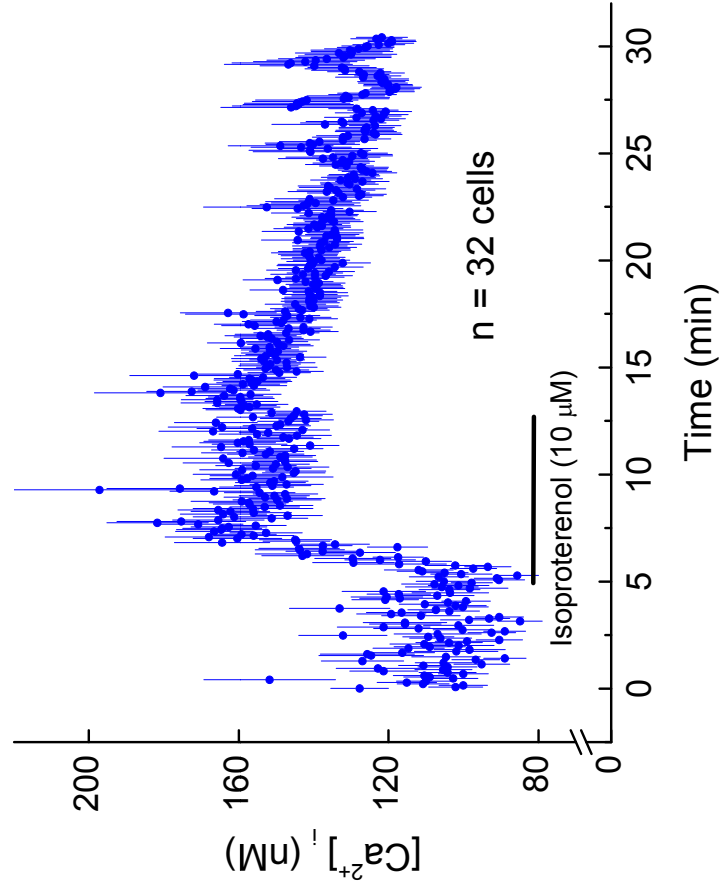

**Isoproterenol (10  $\mu$ M)**

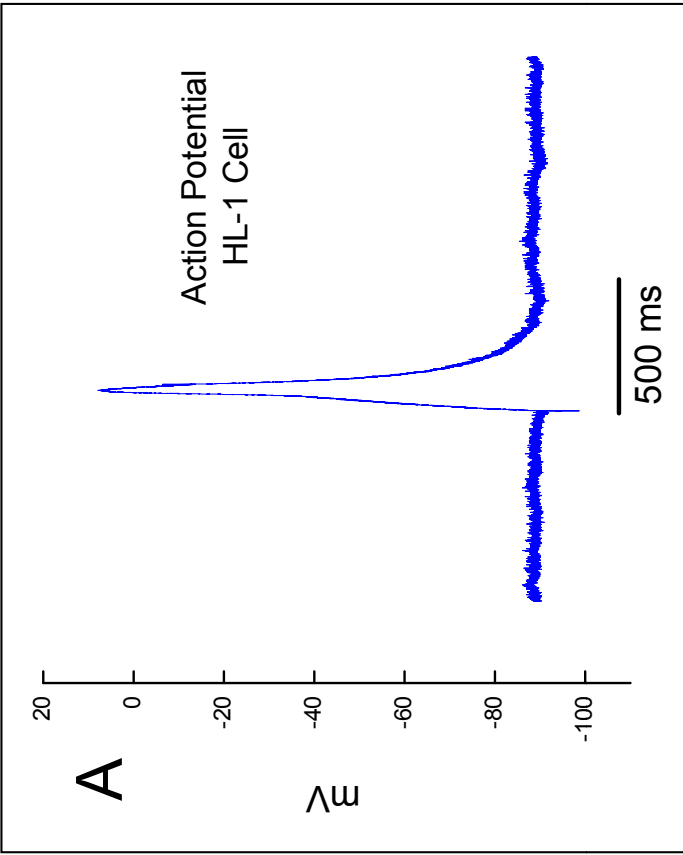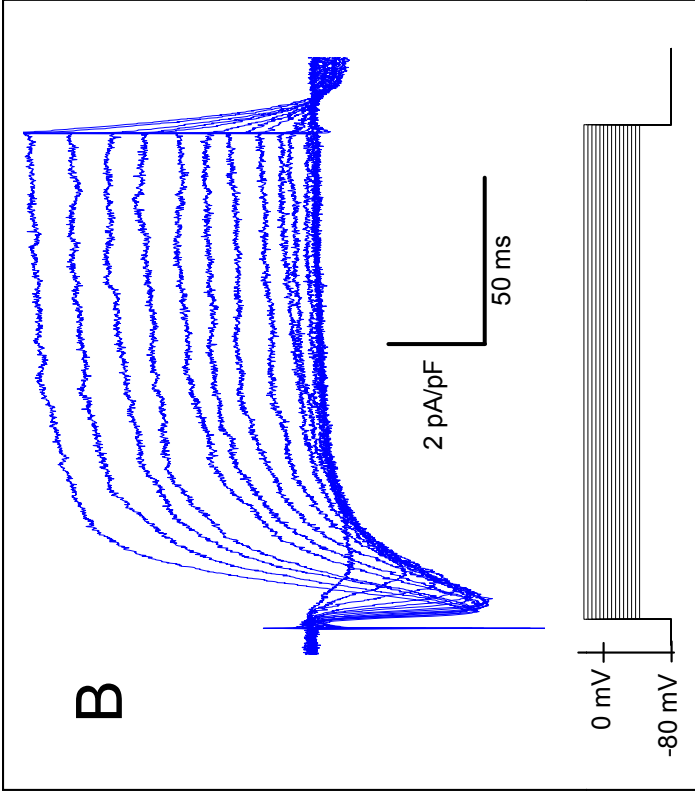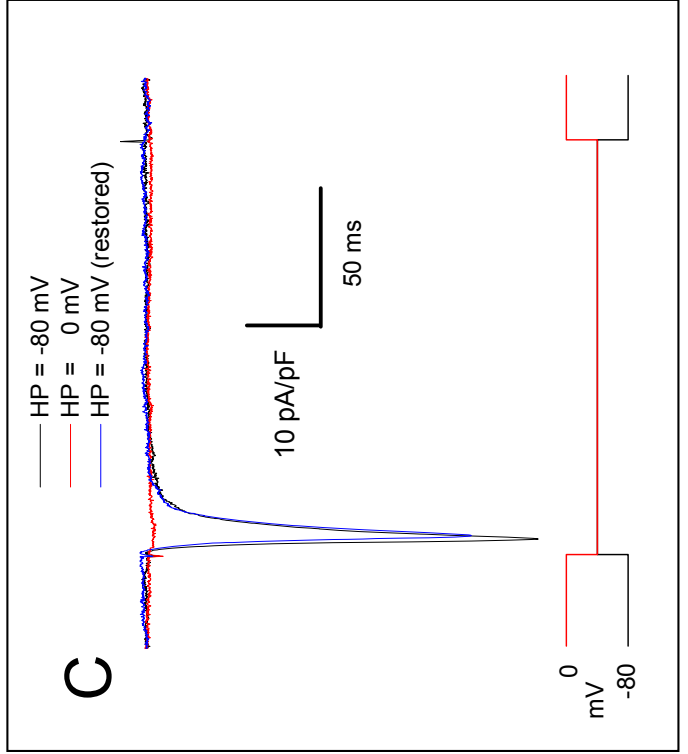

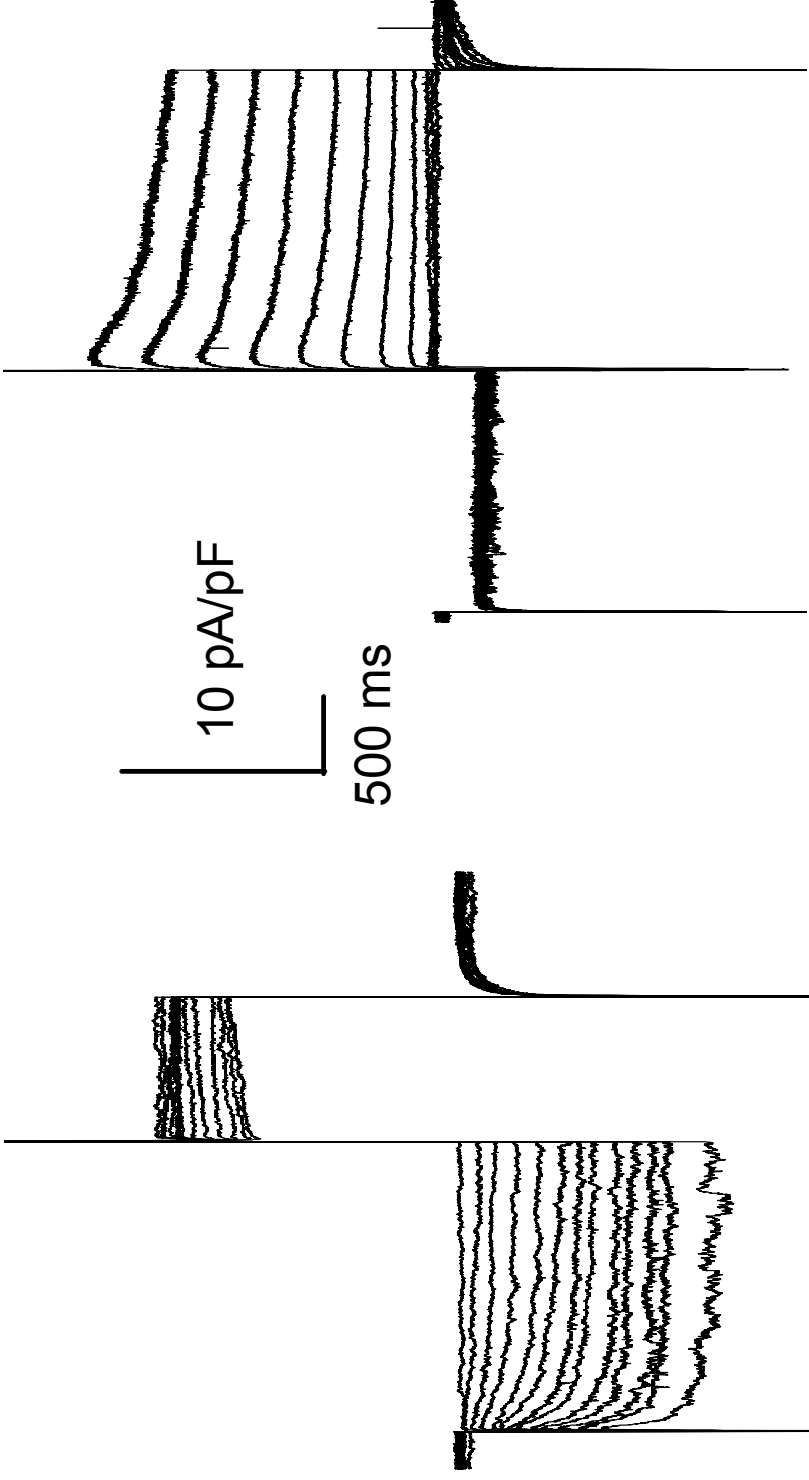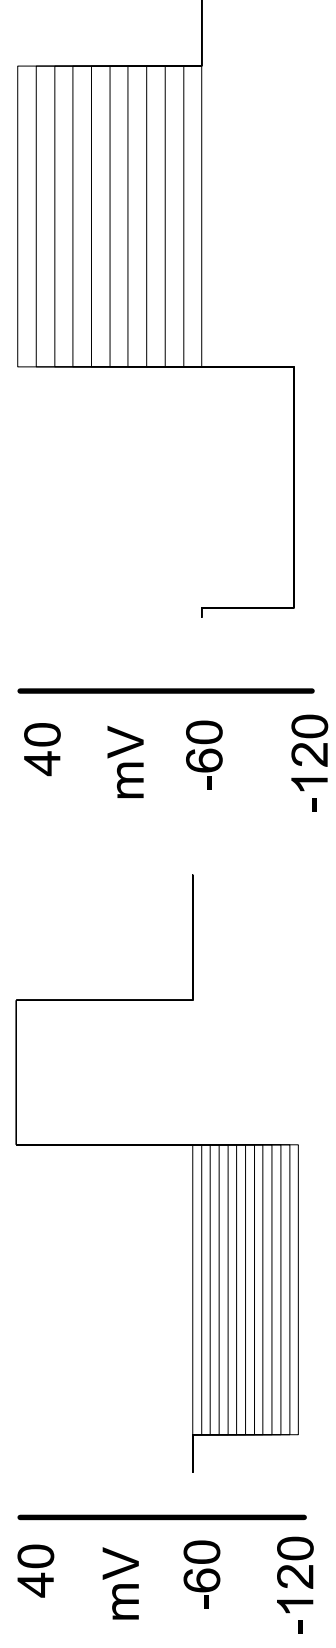

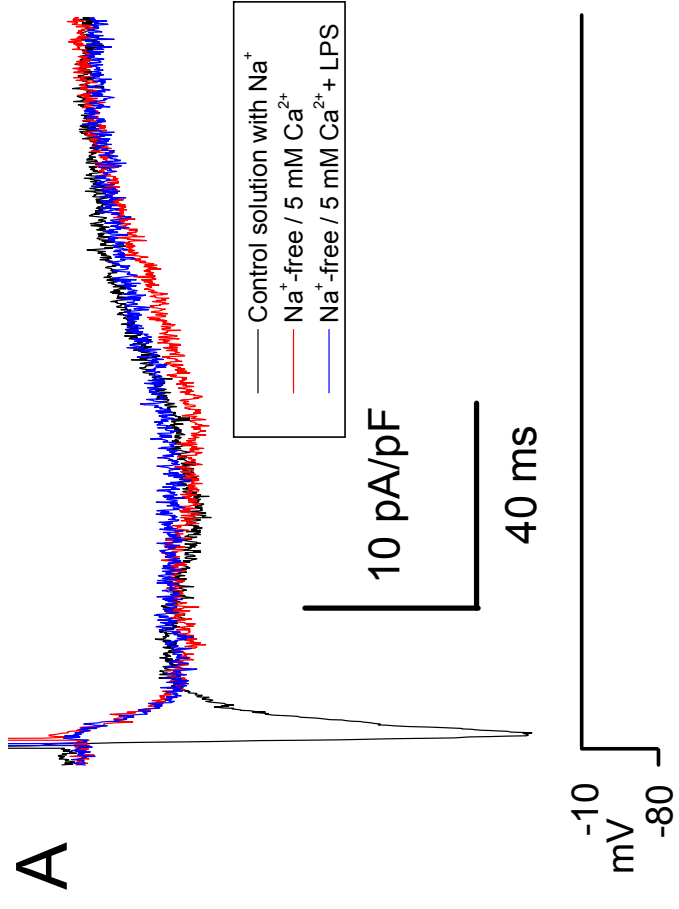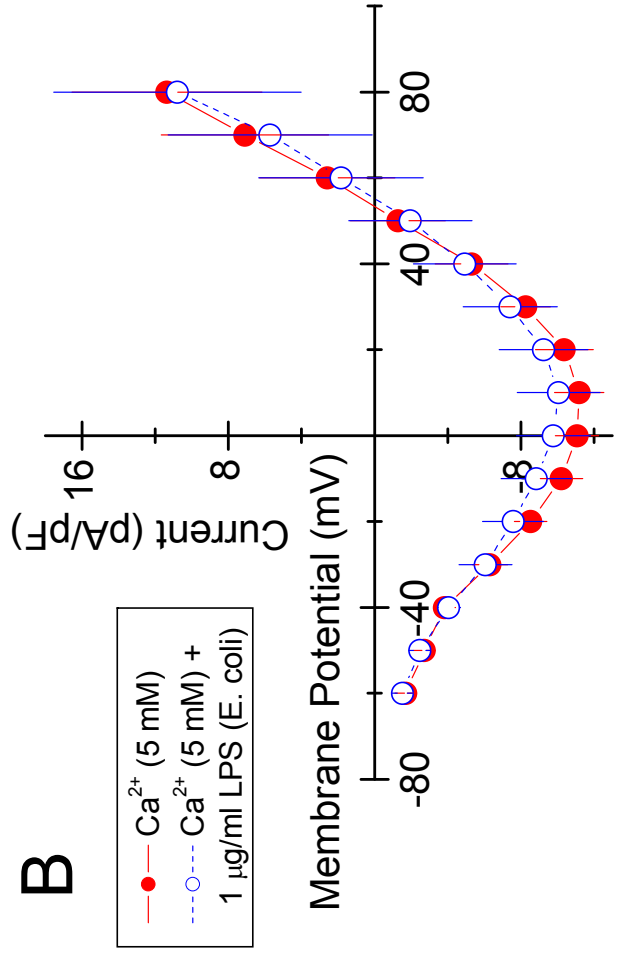

Supplement: 00129.2010_1.pdf [file 00129.2010_1.pdf]
